# Supplementary material
Source: PubMed Central journal article supplement (PMC6989083)
Supplement: JCM.01368-19-s0001.pdf [file JCM.01368-19-s0001.pdf]

Supplementary Table S1. Oligonucleotides used for amplification of target sequence  
and preparation of transcription templates

| Oligo names      | Sequences (5'-3')                                                             |
|------------------|-------------------------------------------------------------------------------|
| RpoB-F           | GGAGTTCTTCGGCACCAGCC                                                          |
| RpoB-R           | GCACCGCCTGGCGCTGCATG                                                          |
| MTB gRNA probe 1 | <u>GTCAGGTACACGATCTCGTCGCATCTACAACAGT</u><br>AGAAATTCCTATAGTGAGTCGTATTAATTTC  |
| MTB gRNA probe 2 | <u>GCGACCGTCCGCATCGATCGGCATCTACAACAGT</u><br>AGAAATTCCTATAGTGAGTCGTATTAATTTC  |
| MAB gRNA probe1  | <u>GGACCAGGATCTTCTCCTCGGTATCTACAACAGT</u><br>AGAAATTCCTATAGTGAGTCGTATTAATTTC  |
| MAB gRNA probe2  | <u>AGTCGACCTCGGTCGCCGAGACATCTACAACAGT</u><br>AGAAATTCCTATAGTGAGTCGTATTAATTTC  |
| MIN gRNA probe1  | <u>CCTTGCGGTACGGGGTCTCGATATCTACAACAGT</u><br>AGAAATTCCTATAGTGAGTCGTATTAATTTC  |
| MIN gRNA probe2  | <u>GGACCAGCACGCGCGACTCCTCATCTACAACAGT</u><br>AGAAATTCCTATAGTGAGTCGTATTAATTTC  |
| MAV gRNA probe1  | <u>TTGTTCTGGTCCATGAACTGGGAATCTACAACAG</u><br>TAGAAATTCCTATAGTGAGTCGTATTAATTTC |
| MAV gRNA probe2  | <u>GGACCAGCACCCGGGCCTCGGCATCTACAACAGT</u><br>AGAAATTCCTATAGTGAGTCGTATTAATTTC  |
| MGO gRNA probe1  | <u>GGACCAGAACGCGCGGCTCAGCATCTACAACAG</u><br>TAGAAATTCCTATAGTGAGTCGTATTAATTTC  |
| MGO gRNA probe2  | <u>TCGCCCCGCTTGCGGCGGACCAATCTACAACAGT</u><br>AGAAATTCCTATAGTGAGTCGTATTAATTTC  |
| MKA gRNA probe1  | <u>GTCAAGTAGTGGATCTCATCAGATCTACAACAGT</u><br>AGAAATTCCTATAGTGAGTCGTATTAATTTC  |
| MKA gRNA probe2  | <u>GGCGGTCTCCTCGTCGGCCGTATCTACAACAGT</u><br>AGAAATTCCTATAGTGAGTCGTATTAATTTC   |

MFO gRNA probe

GCACCATGACGCGGTCTTCGGTATCTACAACAGT

AGAAATTCCTATAGTGAGTCGTATTAATTC

---

Under lines indicate the target sites
